# Supplementary material for: Generation of singlet oxygen over CeO2/K,Na-codoped g-C3N4 for tetracycline hydrochloride degradation over a wide pH range
Source: Royal Society of Chemistry journal article supplement (doi:10.1039/d2dt01748b), 2022-01-01
Supplement: d2dt01748b1.pdf [file d2dt01748b1.pdf]

Supplementary data for Dalton Transactions

## Generation of singlet oxygen over CeO<sub>2</sub>/K, Na-codoped g-C<sub>3</sub>N<sub>4</sub> for tetracycline hydrochloride degradation in a wide pH range

Jianfei Zheng<sup>a</sup>, Zhen Xu<sup>a</sup>, Sitian Xin<sup>a</sup>, Bicheng Zhu<sup>b</sup> and Longhui Nie<sup>\*a,b</sup>,

<sup>a</sup> Hubei Provincial Key Laboratory of Green Materials for Light Industry, New Materials and Green Manufacturing Talent Introduction and Innovation Demonstration Base, Hubei University of Technology, Wuhan 430068, China; <sup>b</sup> State Key Laboratory of Advanced Technology for Materials Synthesis and Processing, Wuhan University of Technology, Wuhan 430070, China

\*Corresponding author: Tel. +86 59750482, E-mails: nielonghui@mail.hbut.edu.cn (L. Nie)

## 1. Results

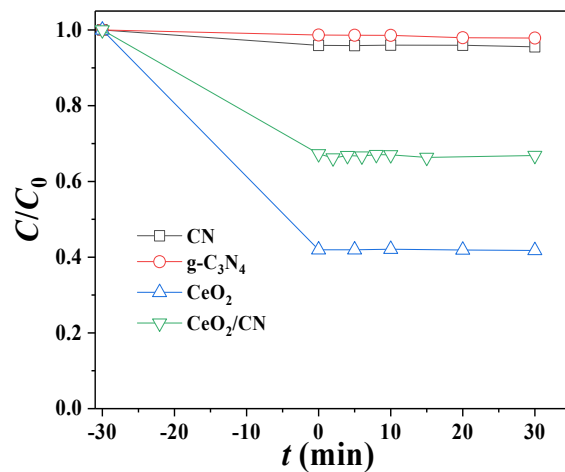

Fig. S1 Adsorption curves of TCH over the CN, g-C<sub>3</sub>N<sub>4</sub>, CeO<sub>2</sub> and CeO<sub>2</sub>/CN catalysts in absence of H<sub>2</sub>O<sub>2</sub>

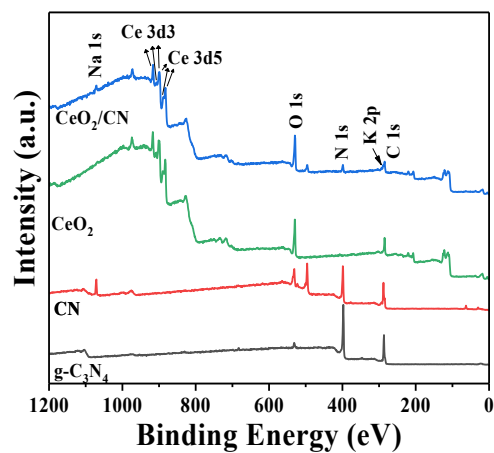

Figure S2 XPS survey spectra for the g-C<sub>3</sub>N<sub>4</sub>, CN, CeO<sub>2</sub> and CeO<sub>2</sub>/CN.

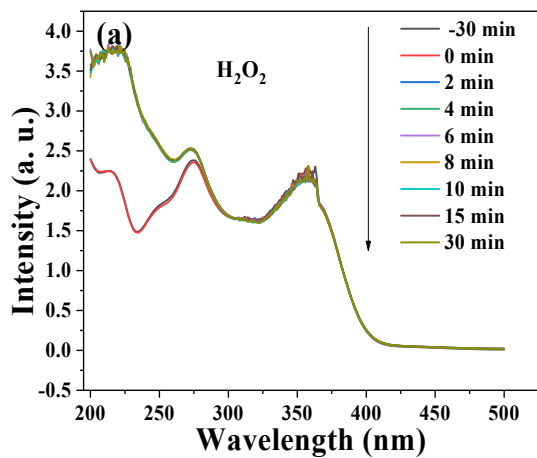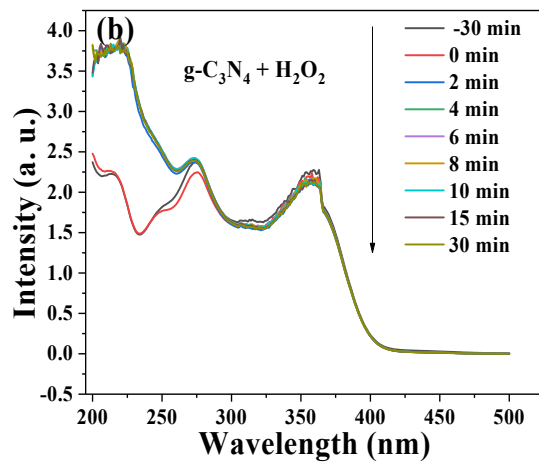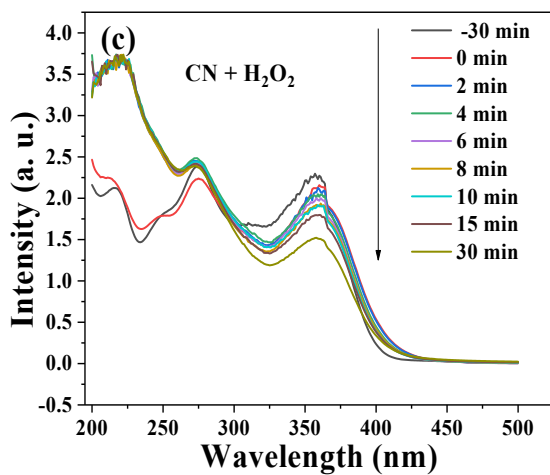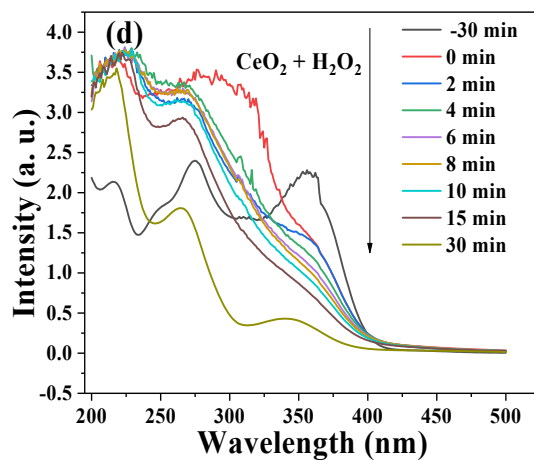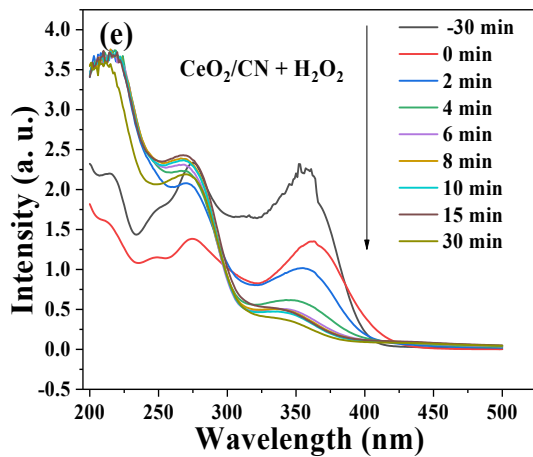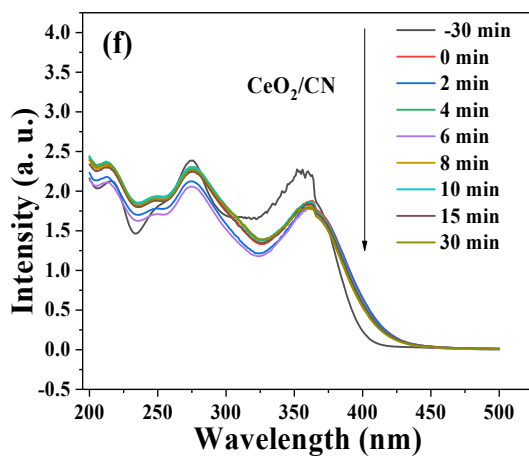

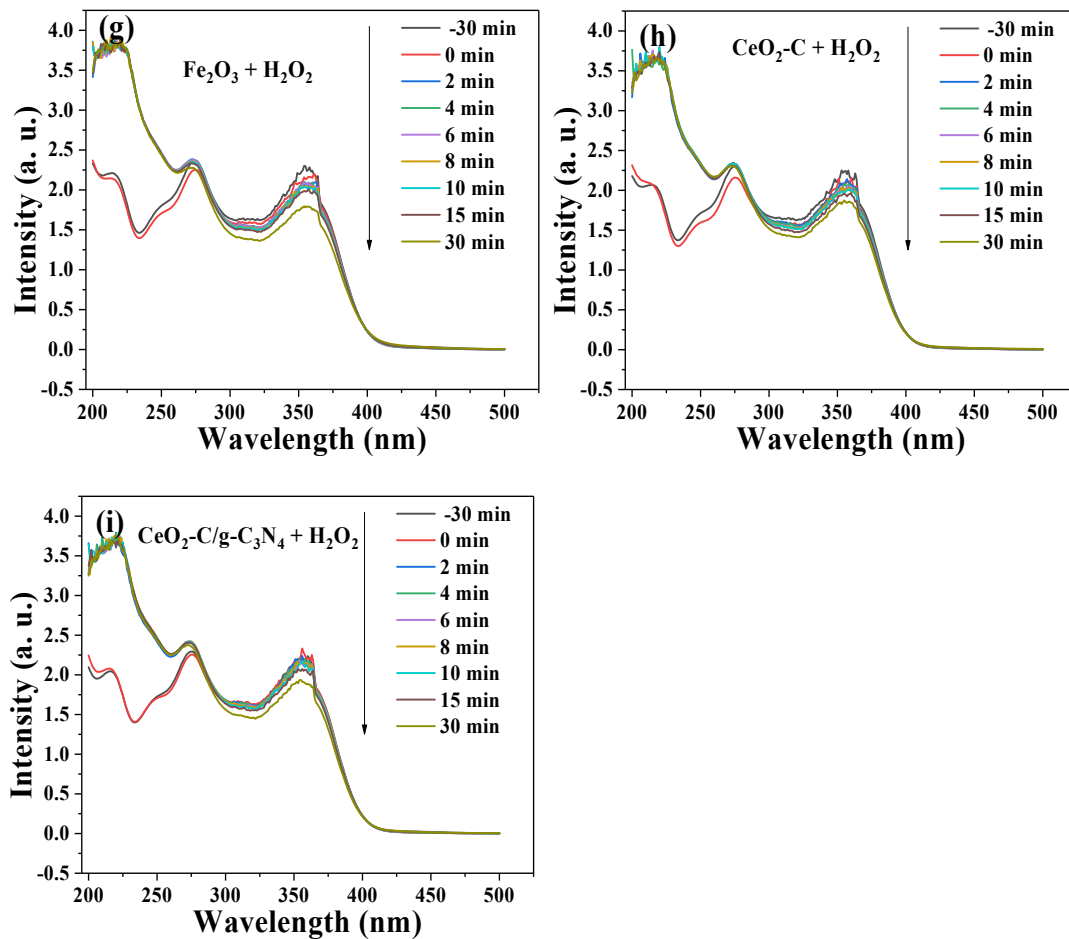

Fig. S3 the UV-vis spectra of TCH dependent on reaction time over  $\text{H}_2\text{O}_2$  (a),  $\text{g-C}_3\text{N}_4 + \text{H}_2\text{O}_2$  (b),  $\text{CN} + \text{H}_2\text{O}_2$  (c),  $\text{CeO}_2 + \text{H}_2\text{O}_2$  (d),  $\text{CeO}_2/\text{CN} + \text{H}_2\text{O}_2$  (e),  $\text{CeO}_2/\text{CN}$  (f),  $\text{Fe}_2\text{O}_3 + \text{H}_2\text{O}_2$  (g),  $\text{CeO}_2\text{-C} + \text{H}_2\text{O}_2$  (h), and  $\text{CeO}_2\text{-C}/\text{g-C}_3\text{N}_4 + \text{H}_2\text{O}_2$  (i), respectively.

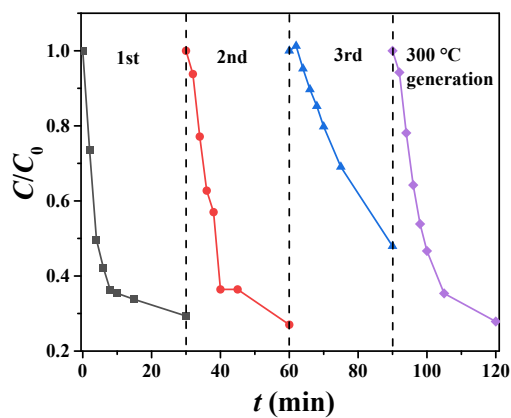

Fig. S4 The degradation curves of TCH in the recycling/regeneration experiments over  $\text{CeO}_2/\text{CN}$  in presence of  $\text{H}_2\text{O}_2$ .

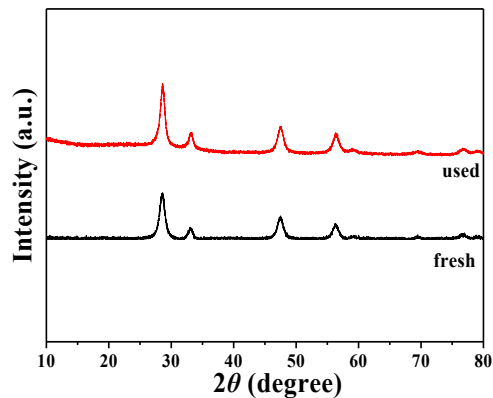

Fig. S5 XRD patterns for the fresh and used  $\text{CeO}_2/\text{CN}$  samples.

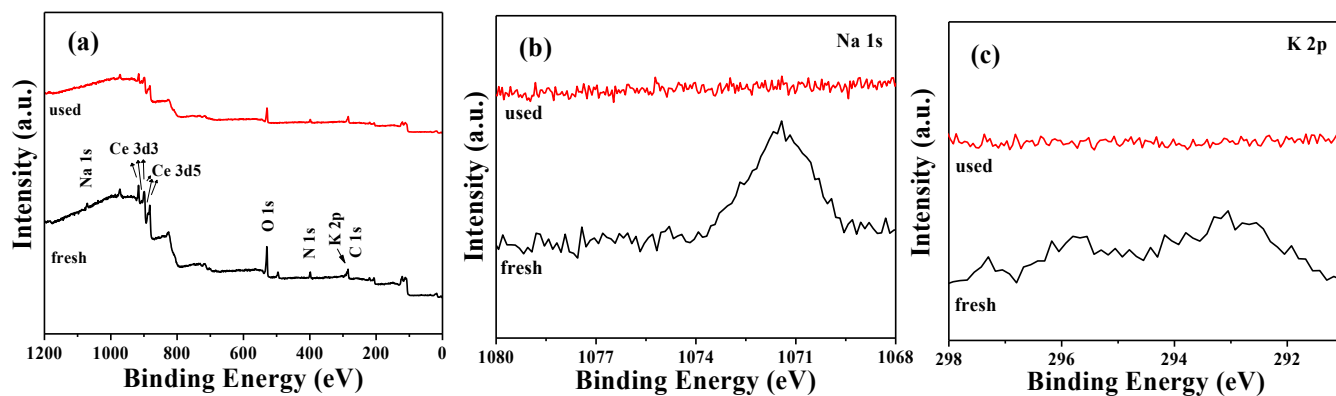

Fig. S6 XPS spectra for the fresh and used  $\text{CeO}_2/\text{CN}$  samples: survey spectra (a), high resolution spectra of Na 1s (b) and K 2p (c).

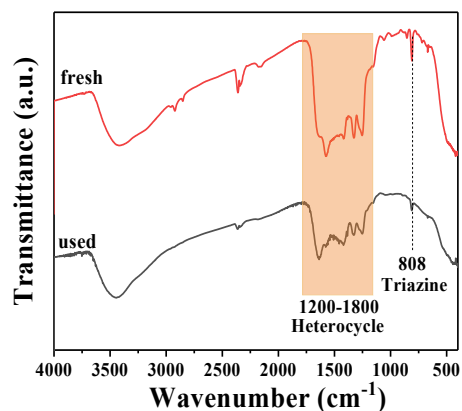

Fig. S7 FTIR spectra for the fresh and used  $\text{CeO}_2/\text{CN}$  samples.

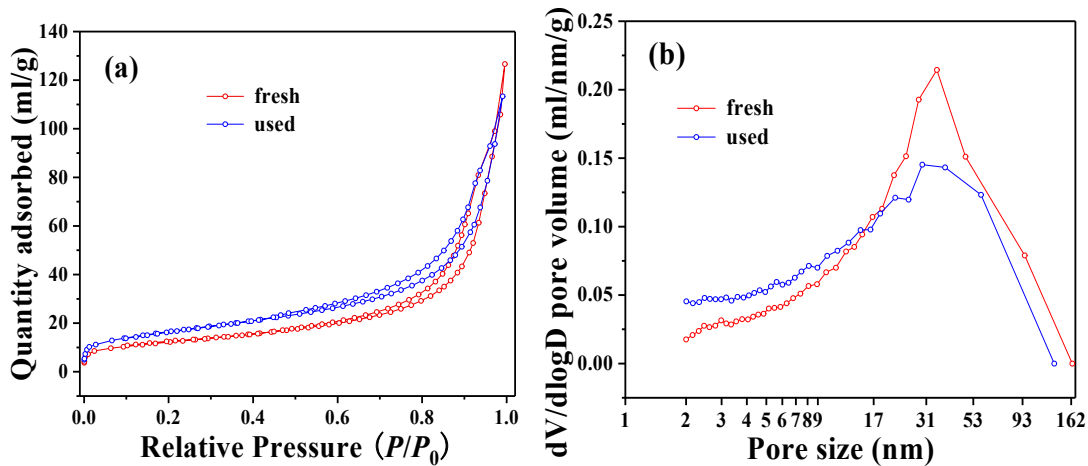

Fig. S8 Nitrogen adsorption-desorption isotherms of the fresh and used CeO<sub>2</sub>/CN samples (a) and the corresponding pore size distribution curves (b).

**Table S1** Binding energies (B.E.) of the elements in the CeO<sub>2</sub>, CN, and CeO<sub>2</sub>/CN samples and the shift of the binding energies (in bracket) of the elements in CeO<sub>2</sub>/CN compared with those in CN or CeO<sub>2</sub>.

| elements | CN                |           | CeO <sub>2</sub> | CeO <sub>2</sub> /CN (binding energy shift) | Atomic percentage of elements |                  |                                   |
|----------|-------------------|-----------|------------------|---------------------------------------------|-------------------------------|------------------|-----------------------------------|
|          | B.E. (eV)         | B.E. (eV) | B.E. (eV)        | B.E. (eV)                                   | CN                            | CeO <sub>2</sub> | CeO <sub>2</sub> /CN (fresh/used) |
| Na 1s    | 1071.4            |           |                  | 1071.5 (+0.1)                               | 7.1                           | /                | 4.0/0.9                           |
| K 2p     | 2p <sub>1/2</sub> | 292.7     |                  | 293.1 (+0.4)                                | 1.0                           |                  | 0.9/0.0                           |
|          | 2p <sub>3/2</sub> | 295.4     |                  | 295.7 (+0.3)                                |                               |                  |                                   |
| C 1s     | C <sub>I</sub>    | 284.8     |                  | 284.8                                       | 42.0                          | /                | 34.1/47.7                         |
|          | C <sub>II</sub>   | 286.3     |                  | 285.9 (-0.4)                                |                               |                  |                                   |
|          | C <sub>III</sub>  | 288.2     |                  | 288.5 (+0.3)                                |                               |                  |                                   |
| N 1s     | N <sub>I</sub>    | 398.5     |                  | 398.6 (+0.1)                                |                               |                  |                                   |
|          | N <sub>II</sub>   | 399.6     |                  | 399.7 (+0.1)                                | 35.6                          | /                | 8.2/11.3                          |
|          | N <sub>III</sub>  | 401.0     |                  | 401.2 (+0.2)                                |                               |                  |                                   |
|          | N <sub>IV</sub>   | 404.7     |                  | 406.8 (+2.1)                                |                               |                  |                                   |
| Ce 3d    | v                 |           | 900.9            | 900.8 (-0.1)                                |                               |                  |                                   |
|          | v'                |           | 903.2            | 903.1 (-0.1)                                |                               |                  |                                   |
|          | v''               |           | 907.5            | 907.4 (-0.1)                                |                               |                  |                                   |

|      |                  |       |              |      |      |           |
|------|------------------|-------|--------------|------|------|-----------|
|      | $\nu'''$         | 916.8 | 916.6 (-0.2) | /    | 28.9 | 12.4/5.9  |
|      | $\mu$            | 882.3 | 882.2 (-0.1) |      |      |           |
|      | $\mu'$           | 884.6 | 884.5 (-0.1) |      |      |           |
|      | $\mu''$          | 888.9 | 888.8 (-0.1) |      |      |           |
|      | $\mu'''$         | 898.2 | 898.0 (-0.2) |      |      |           |
|      | O <sub>I</sub>   | 529.4 | 529.2 (-0.3) |      |      |           |
| O 1s | O <sub>II</sub>  | 531.1 | 530.6 (-0.5) | 14.5 | 71.1 | 40.3/34.2 |
|      | O <sub>III</sub> | 532.4 | 532.2 (-0.2) |      |      |           |

The atomic percentage of each element was supplemented in Table S1. For both CN and CeO<sub>2</sub>/CN, the atomic percentage of Na is higher than that of K, indicating Na is easier to dope into g-C<sub>3</sub>N<sub>4</sub> possibly owing to its smaller ion size. Compared with CN, the atomic percentage of Na, K, C and N in CeO<sub>2</sub>/CN shows a decrease in different degree owing to the incorporation of CeO<sub>2</sub>. The molar ratios of C/N for CN and CeO<sub>2</sub>/CN are 1.8 and 4.2, respectively, indicating that N vacancies are formed in both samples and more N vacancies exist in the later. The Na contents before and after reaction (for three repeated experiments) in CeO<sub>2</sub>/CN are 4.0 % and 0.9 % of atomic percentage by XPS, and the K contents before and after reaction in CeO<sub>2</sub>/CN are 0.9 % and 0.0 % of atomic percentage, respectively. The decrease of the contents of Na<sup>+</sup> and K<sup>+</sup> ions in the used sample by XPS is owing to the adsorption of intermediates formed in the degradation of TCH on the surface of CeO<sub>2</sub>/CN because the XPS technique can only analyze elemental content in the surface thin layer.

**Table S2** Possible degradation intermediates identified by LC-MS.

| Compounds | Retention time<br>(min) | <i>m/z</i> | Proposed structure |
|-----------|-------------------------|------------|--------------------|
| TC        | 3.82                    | 445        |                    |

|    |      |     |                                                                                       |
|----|------|-----|---------------------------------------------------------------------------------------|
| 1  | 6.61 | 387 | 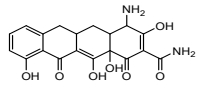    |
| 2  | 1.24 | 345 |    |
| 3  | 1.03 | 317 |    |
| 4  | 1.01 | 273 |    |
| 5  | 7.50 | 267 |    |
| 6  | 1.27 | 239 |    |
| 7  | 1.19 | 195 |    |
| 8  | 1.30 | 477 |    |
| 9  | 2.07 | 403 |  |
| 10 | 1.45 | 388 |  |
| 11 | 7.67 | 294 |  |
| 12 | 1.00 | 256 |  |
| 13 | 2.37 | 226 |  |
| 14 | 5.94 | 228 |  |
| 15 | 0.92 | 192 |  |
| 16 | 8.06 | 149 |  |



|    |      |     |                                                                                     |
|----|------|-----|-------------------------------------------------------------------------------------|
| 17 | 2.26 | 145 | 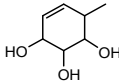  |
| 18 | 5.97 | 101 |  |
| 19 | 1.19 | 89  |  |

**Table S3** Characteristic parameters of the fresh and used CeO<sub>2</sub>/CN samples.

| Sample                     | $S_{\text{BET}}$ (m <sup>2</sup> /g) | $V_{\text{pore}}$ (cm <sup>3</sup> /g) | $d_{\text{pore}}$ (nm) |
|----------------------------|--------------------------------------|----------------------------------------|------------------------|
| Fresh CeO <sub>2</sub> /CN | 43.4                                 | 0.17                                   | 16.4                   |
| used CeO <sub>2</sub> /CN  | 59.6                                 | 0.17                                   | 11.7                   |
